# Supplementary material for: A Pathway Switch Directs BAFF Signaling to Distinct NFκB Transcription Factors in Maturing and Proliferating B Cells
Source: PubMed Central journal article supplement — Cell Rep. Author manuscript; Available in PMC 2016 Jun 2. (PMC4889572; doi:10.1016/j.celrep.2014.11.024), 2014-12-11
Supplement: NIHMS776270-supplement-Supplement.pdf [file NIHMS776270-supplement-Supplement.pdf]

Cell Reports, Volume 9

Supplemental Information

**A Pathway Switch Directs BAFF Signaling  
to Distinct NF $\kappa$ B Transcription Factors  
in Maturing and Proliferating B Cells**

Jonathan V. Almaden, Rachel Tsui, Yi C. Liu, Harry Birnbaum, Maxim N. Shokhirev, Kim A. Ngo, Jeremy C. Davis-Turak, Dennis Otero, Soumen Basak, Robert C. Rickert, and Alexander Hoffmann

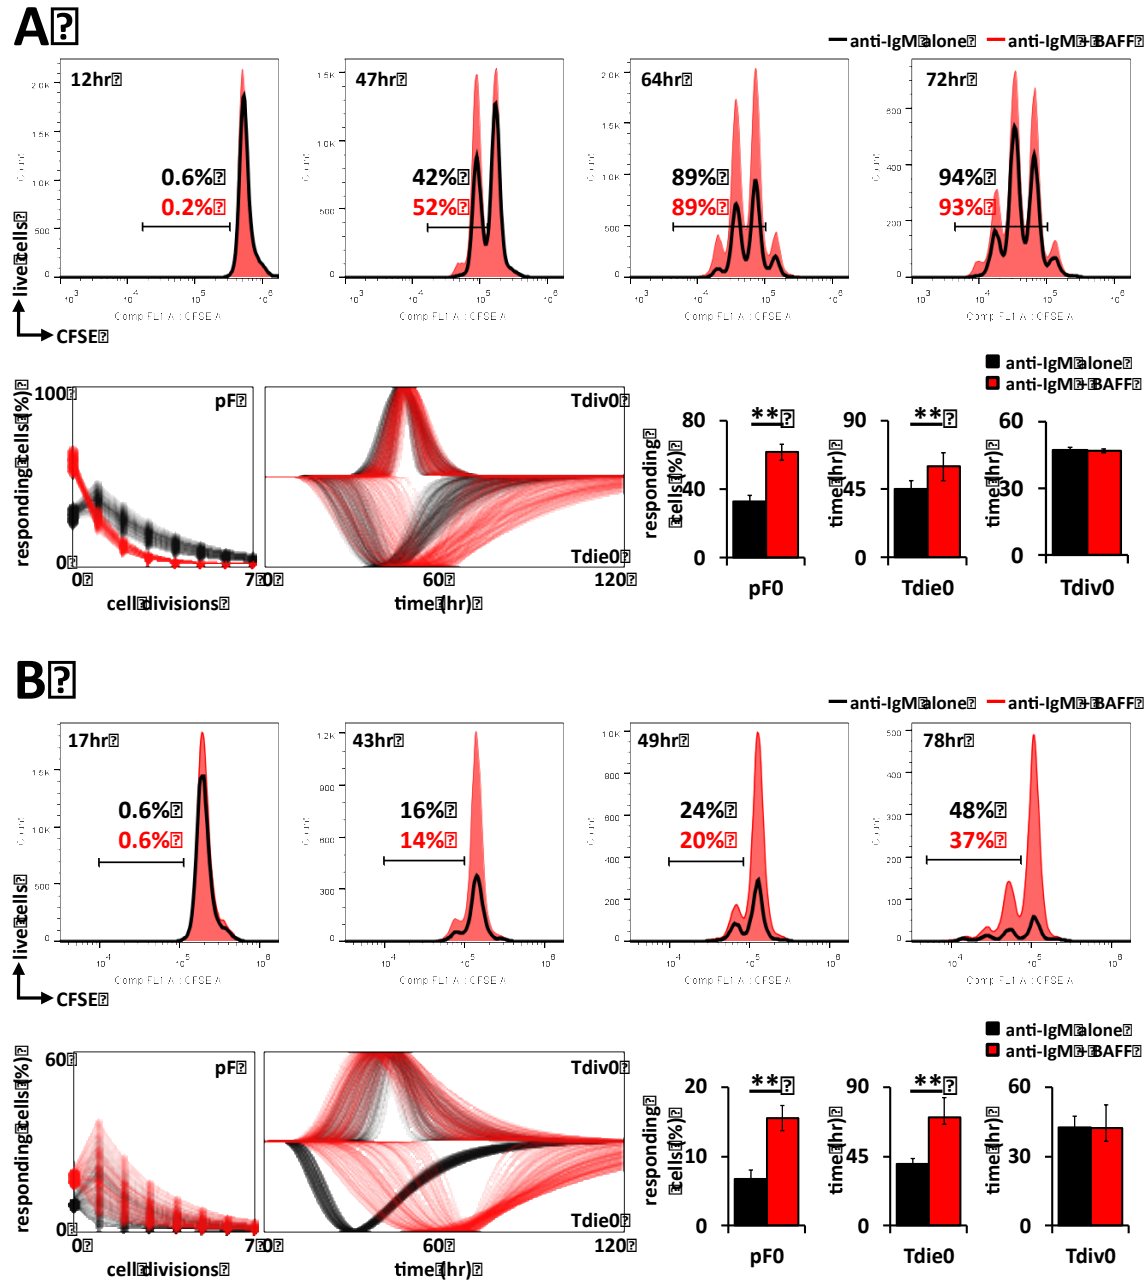

**Figure S1. (relates to Figure 1)**

**Replicate analysis of *wild type* B cell expansion stimulated with anti-IgM and BAFF**

(A) *In vitro* proliferation of CFSE labeled wild type B cells and stimulated for three days with 10 $\mu\text{g}/\text{ml}$  anti-IgM alone (black) or 10 $\mu\text{g}/\text{ml}$  anti-IgM + 50ng/ml BAFF ligand (red) and analyzed by FACS. Live cell numbers gated by exclusion of 7AADHi population. Gates represent B cells that have undergone at least one cell division. Lower left: Maximum likelihood cell parameters that underlie the population dynamics produced by anti-IgM (black) or anti-IgM + BAFF (red), as derived with FlowMax software tool: the fraction of responding cells at each generation, histograms of the time to division or cell death of the first generation. Lower right: the fraction of generation zero B cells undergoing division (pF0), the average time to division of generation zero (Tdiv0), and average time to death of generation zero (Tdie0) cells.

(B) Same as (A), except using 5 $\mu\text{g}/\text{ml}$  of anti-IgM (black) or 5 $\mu\text{g}/\text{ml}$  anti-IgM + 50ng/ml BAFF (red).

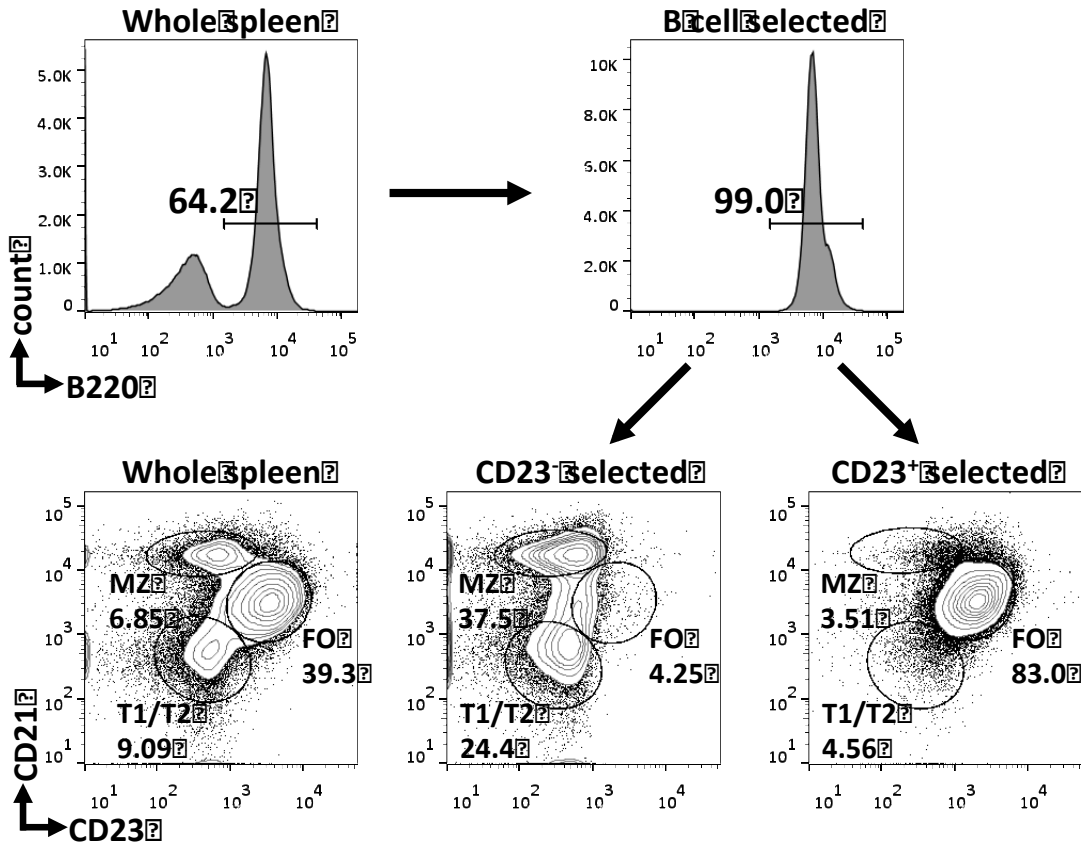

**Figure S2. (relates to Figure 3)**

**Strategy for isolating a homogenous population of follicular mature B cells from spleen.**

Representative FACS plot of whole spleen B cells before separation (top, left panel) followed by B cell isolation using antibody cocktail consisting of biotin-conjugated monoclonal anti-mouse antibodies against CD43, CD4, CD93, and Ter119 (top, right panel). Resulting B cells are further separated using CD23 MicroBeads. Total splenic B cell populations (bottom, left panel), isolated immature (T1/T2) and marginal zone (MZ) CD23<sup>-</sup> population (bottom, middle panel) and purified mature follicular (FO) B cells are shown (bottom, right panel).

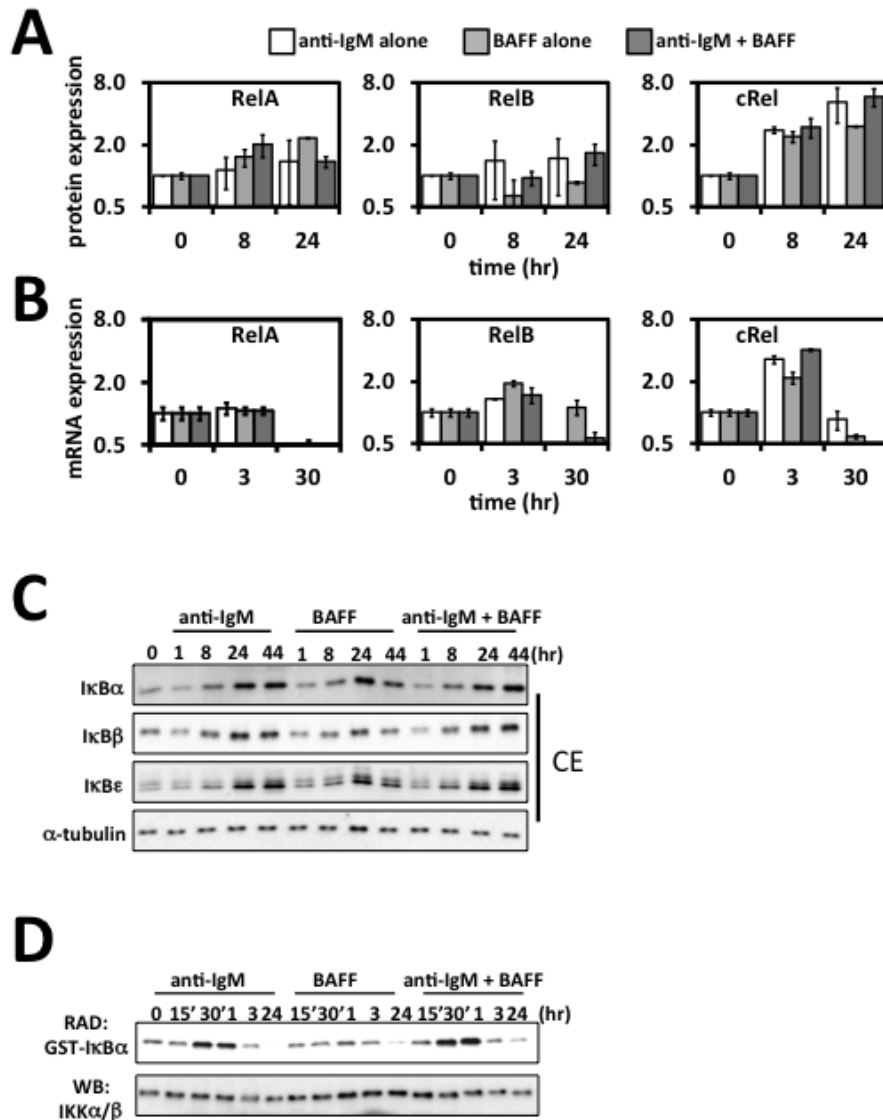

**Figure S3. (relates to Figure 2 and 4)**

**Quantitative experimental data of IKK-NF $\kappa$ B signaling in B-cells used to constrain the parameterization of the mathematical model**

(A) Expression profiles of NF $\kappa$ B family proteins in B cells.

Quantification of immunoblots for RelA, RelB, and cRel protein levels in anti-IgM alone, BAFF alone, or anti-IgM + BAFF stimulated *wild type* B cells (N=4) S.D.

(B) Expression profiles of NF $\kappa$ B family mRNAs in B cells. qPCR analysis of RelA, RelB, and cRel mRNA levels in anti-IgM alone, BAFF alone, or anti-IgM + BAFF stimulated *wild type* B cells (N=3) S.D.

(C) BAFF co-stimulation has little effect on BCR-induced canonical NF $\kappa$ B pathway activity. Canonical I $\kappa$ Bs protein levels of I $\kappa$ B $\alpha$ , I $\kappa$ B $\beta$ , and I $\kappa$ B $\epsilon$  in stimulated *wild type* B cells were measured by immunoblot upon stimulation with anti-IgM alone, BAFF alone, or anti-IgM and BAFF co-stimulation as indicated.

(D) NEMO-associated kinase activity was determined in *wild type* B cells in an *in vitro* IP-kinase assay upon stimulation with anti-IgM alone, BAFF alone, or anti-IgM and BAFF co-stimulation as indicated.

**A?**

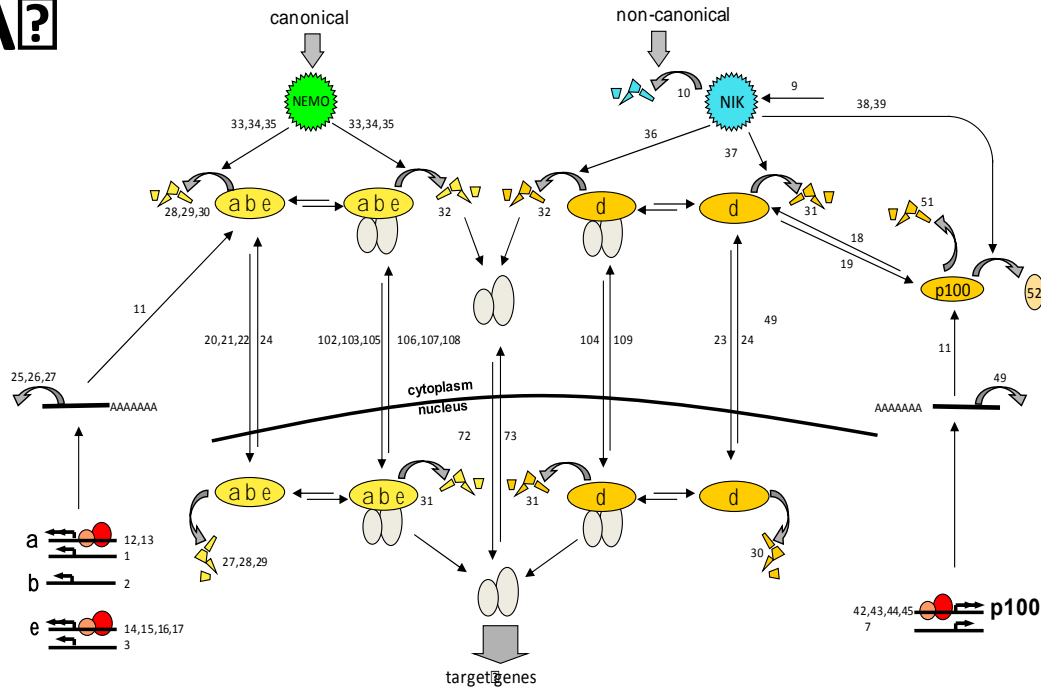

**B?**

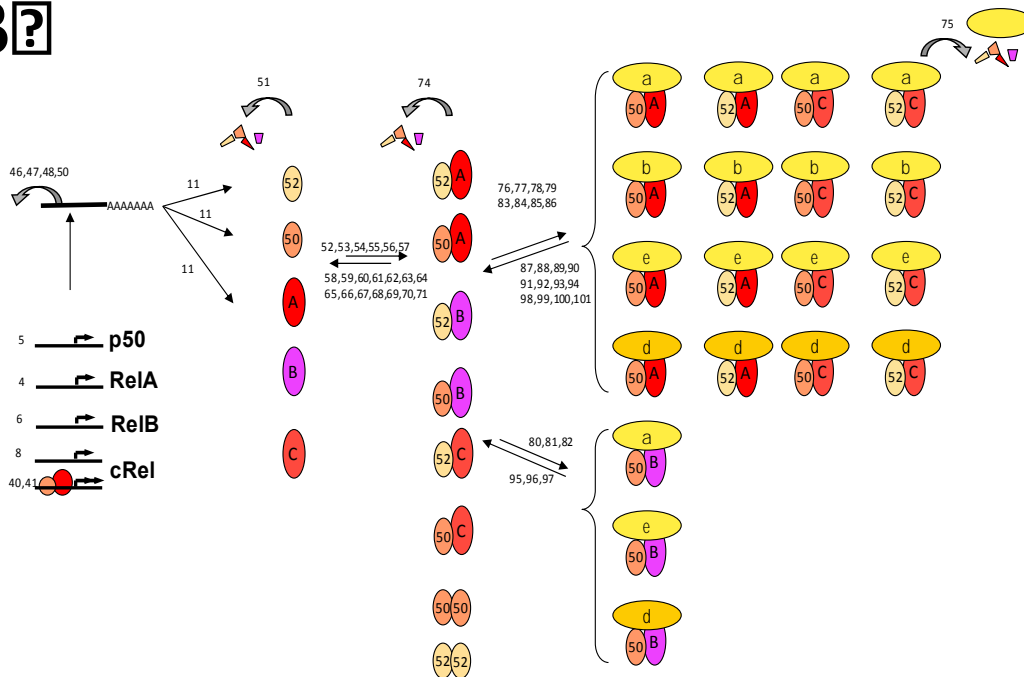

**Figure S4. (relates to Figure 4)**

**Wiring diagram of the NF $\kappa$ B signaling system depicting biochemical reactions described in the mathematical model**

(A) A schematic of the I $\kappa$ B network that includes both the canonical pathway through NEMO/IKK2 activity and the non-canonical pathway through NIK/IKK1. Four I $\kappa$ Bs interact with a general NF $\kappa$ B dimer (grey) that is then further described in (b). p100 is a substrate for both dimerization to I $\kappa$ B $\delta$  and NIK/IKK1-dependent processing to p52.

(B) A schematic of the NF $\kappa$ B network: monomers, and dimers as well as I $\kappa$ B-NF $\kappa$ B complexes whose synthesis and degradation is accounted for by the mathematical model.

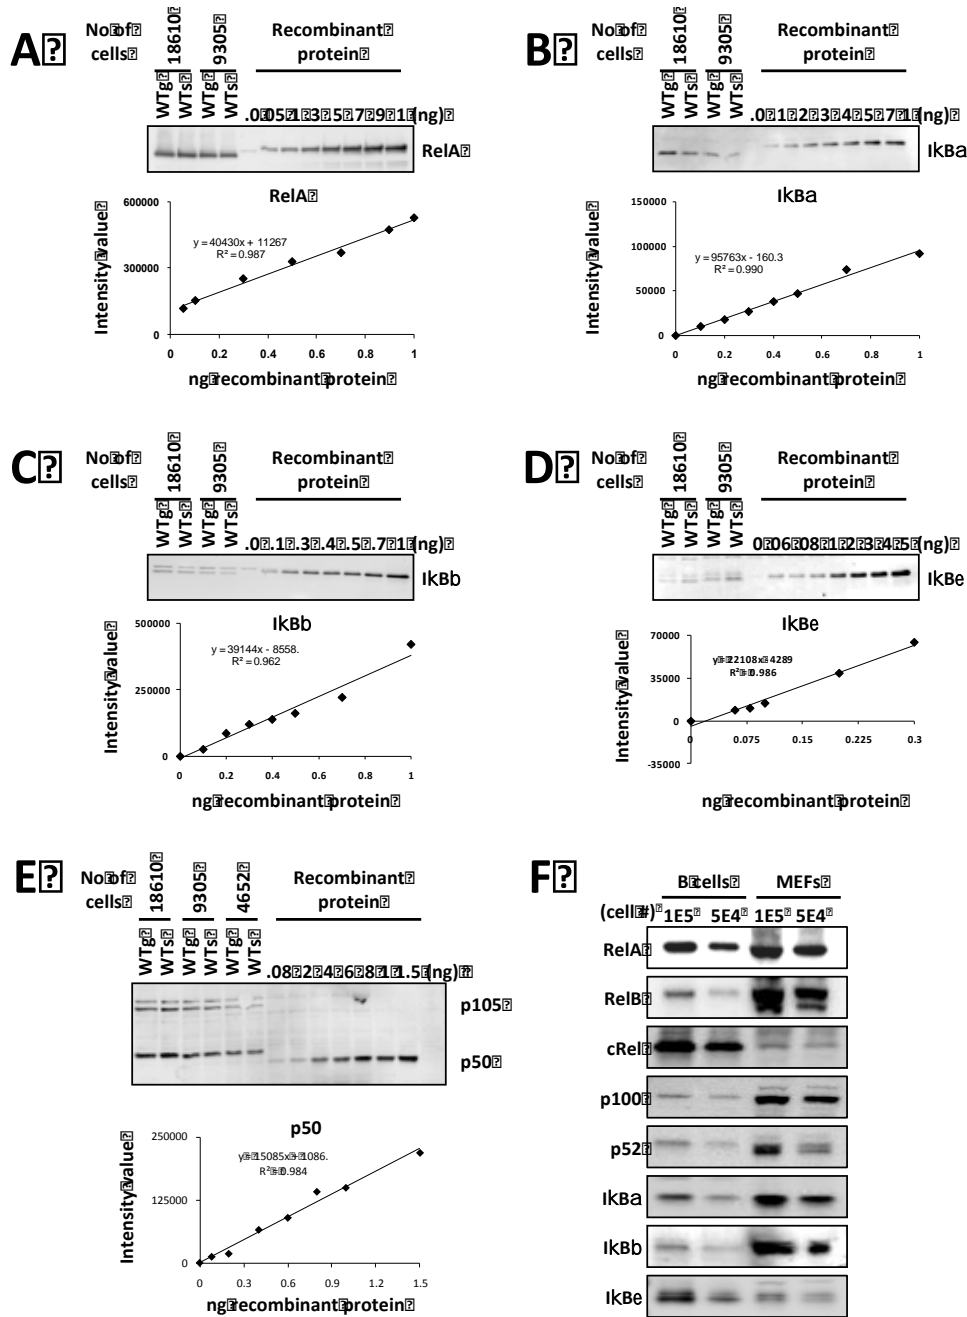

**Figure S5. (relates to Figure 4, Table S3)**

**Determining NFκB and IκB protein levels in MEFs and B-cells**

(A-E) Immunoblots of indicated numbers of wild type fibroblast extracts (growing or serum starved) compared with recombinant protein standards diluted in whole cell extracts prepared from mutant fibroblasts deficient in the respective protein. Signal intensities were quantitated by a phosphoimager and a best fit linear standard curve was graphed. Amounts of NFκB protein in MEFs were calculated based on this standard curve.

(F) Immunoblot of wild type B cells and wild type fibroblasts for the basal levels of RelA, RelB, cRel, p100, p52, IκBα, IκBβ, and IκBε. This was used in determining the basal levels of protein abundances in B cells compared to MEFs for the initial parameterization of the B-cell model. Gel images in are representative of three experiments. The quantitated concentrations and molecule numbers are summarized in Table S3.

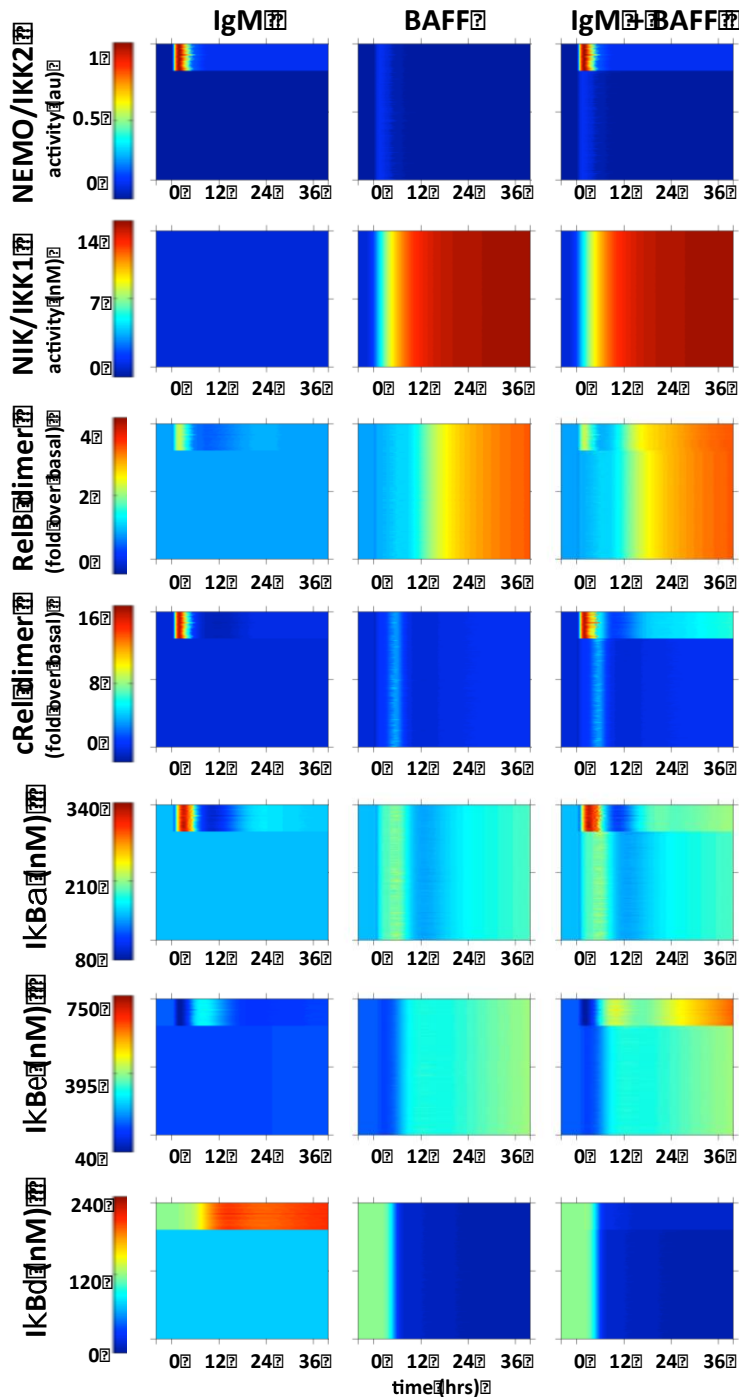

**Figure S6. (relates to Figure 4)**

**Single cell simulation of anti-IgM, BAFF, and co-stimulation of the B cell NF $\kappa$ B model**

Timecourses depicting IKK activity (model simulation input) in the top row and calculated timecourses in subsequent rows, specifically nuclear DNA binding activities of RelB and cRel, and abundances of  $\text{I}\kappa\text{B}\alpha$ ,  $\text{I}\kappa\text{B}\epsilon$ , and  $\text{I}\kappa\text{B}\delta$ . Each graph shows the results of simulations of 1000 B cells for each condition (anti-IgM, BAFF, and co-stimulation). Cells vary in whether they activate IKK or not, and when the IKK activity is activated. Individual simulation tracks are shown, as well as the average (dashed line).

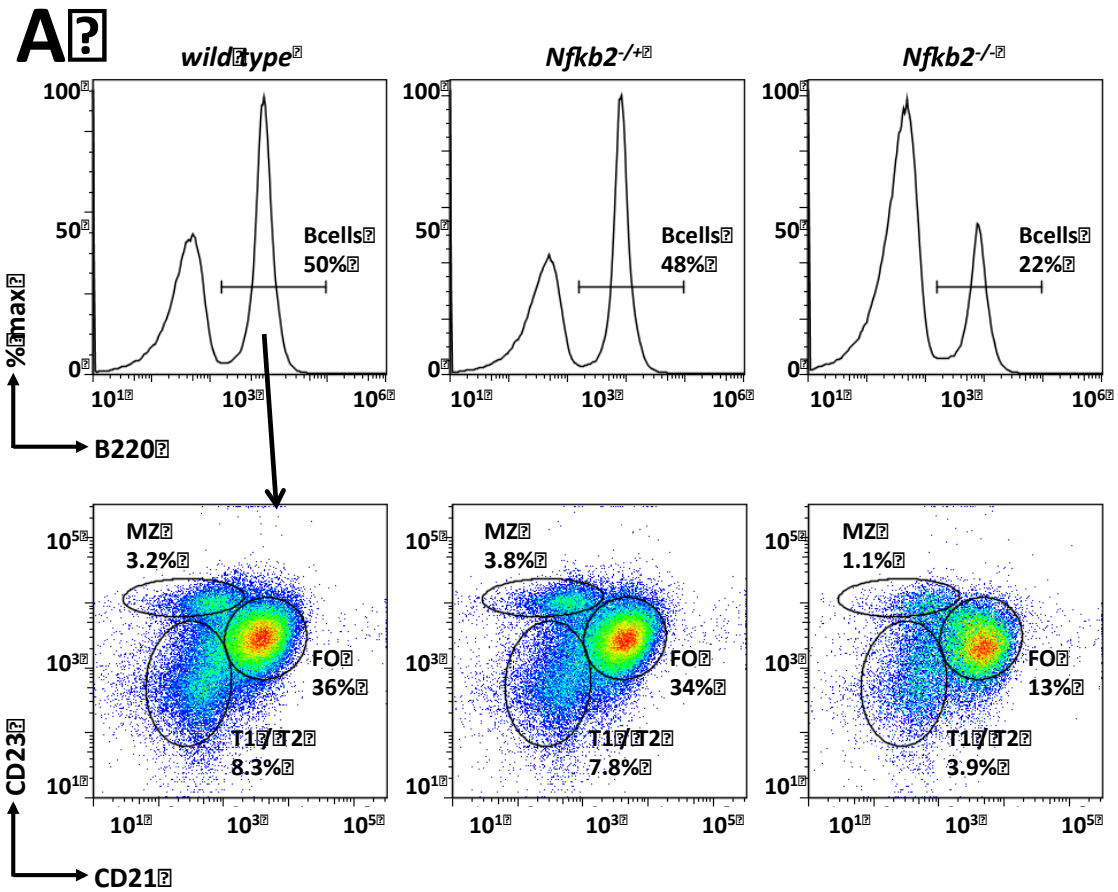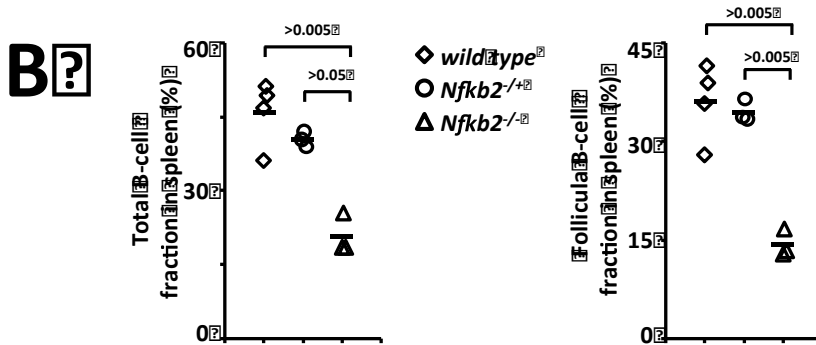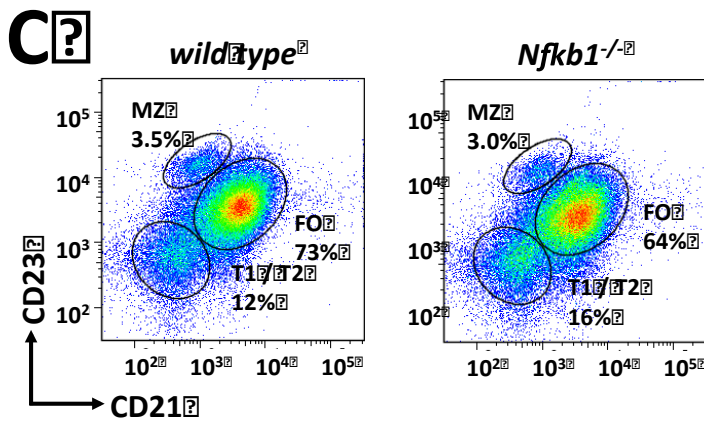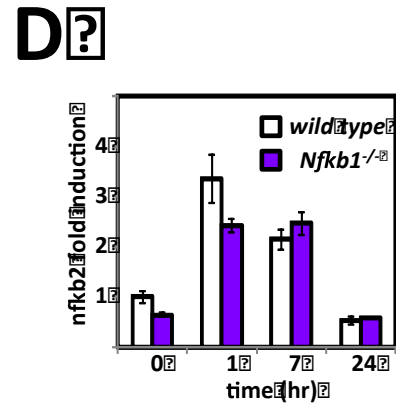



**Figure S7. (relates to Figure 5 and 6)****Normal B cell development in *Nfkb2*<sup>+/-</sup> and *Nfkb1*<sup>-/-</sup> mice**

(A) B cell development is defective in *Nfkb2*<sup>-/-</sup> mice, but unaffected in *Nfkb2*<sup>+/-</sup> mice. Splenocytes were stained with anti-B220, anti-CD21, and anti-CD23. B cells populations are gated as B220<sup>+</sup> (top row). For cells gated on B220<sup>+</sup>, marginal zone B cells (CD21<sup>hi</sup>CD23<sup>lo</sup>), follicular B cells (CD21<sup>lo</sup>CD23<sup>hi</sup>) and transitional 1 and transitional 2 B cells (CD21<sup>lo</sup>CD23<sup>lo</sup>) are shown (bottom row). Representative data of 4 mice shown.

(B) The numbers of total and FO B cells obtained from (A) are displayed graphically.

(C) Normal B cell development in *Nfkb1*<sup>-/-</sup> mice. Splenocytes were stained with anti-B220, anti-CD21, and anti-CD23. B cells populations are gated as B220<sup>+</sup> (not shown). For cells gated on B220<sup>+</sup>, marginal zone B cells (CD21<sup>hi</sup>CD23<sup>lo</sup>), follicular B cells (CD21<sup>lo</sup>CD23<sup>hi</sup>) and transitional 1 and transitional 2 B cells (CD21<sup>lo</sup>CD23<sup>lo</sup>) are shown. Representative data of 3 mice shown.

(D) *Nfkb2* gene expression was monitored by qPCR in *wild type* and *nfkb1*<sup>-/-</sup> B cells stimulated with anti-IgM (n=3).

**Table S1. (relates to Figure 4)  
Reactions and Parameters**

Model parameters and biochemical rate constants. Parameter identifiers (column 4 and supplementary Figure 4) are related to reaction descriptions and reaction rate constants.

| Reaction                                                                         | Location  | Parameter No. | Parameter Value                           | Category             | Source                                                                                                                                                                                                |
|----------------------------------------------------------------------------------|-----------|---------------|-------------------------------------------|----------------------|-------------------------------------------------------------------------------------------------------------------------------------------------------------------------------------------------------|
| <b>Reaction rates determined by transcriptional programs and cytokine levels</b> |           |               |                                           |                      |                                                                                                                                                                                                       |
| =>tkB $\alpha$ (basal)                                                           | Nucleus   | 1             | 4.8e-3 nM/min                             | I $\kappa$ B Synth.  | Parameter value chosen to fit mRNA and protein Expression profiles as measure by RNase Protection (RPA) and Western blot assays, reformulated from Werner et al. (2008) to fit a Hill function        |
| =>tkB $\beta$ (basal)                                                            | Nucleus   | 2             | 1.2e-3 nM/min                             | I $\kappa$ B Synth.  | Refer to #1                                                                                                                                                                                           |
| =>tkB $\epsilon$ (basal)                                                         | Nucleus   | 3             | 1.2e-4 nM/min                             | I $\kappa$ B Synth.  | Refer to #1                                                                                                                                                                                           |
| =>tRelA (basal)                                                                  | Nucleus   | 4             | 3.6e-5 nM/min                             | NF $\kappa$ B Synth. | Refer to #1                                                                                                                                                                                           |
| =>tp50 (basal)                                                                   | Nucleus   | 5             | 2.9e-5 nM/min                             | NF $\kappa$ B Synth. | Refer to #1                                                                                                                                                                                           |
| =>tRelB (basal)                                                                  | Nucleus   | 6             | 4.2e-5 nM/min                             | NF $\kappa$ B Synth. | Refer to #1/Fitted                                                                                                                                                                                    |
| =>tp100 (basal)                                                                  | Nucleus   | 7             | 8e-7 nM/min                               | NF $\kappa$ B Synth. | Refer to #1                                                                                                                                                                                           |
| =>cRel (basal)                                                                   | Nucleus   | 8             | 3.6e-6 nM/min                             | NF $\kappa$ B Synth. | Refer to #1/Fitted                                                                                                                                                                                    |
| => NIK                                                                           | Cytoplasm | 9             | 4.2e-2 nM/min                             | NIK Synth.           | Set to yield measured abundance in conjunction with #10                                                                                                                                               |
| NIK =>                                                                           | Cytoplasm | 10            | 4.6e-2                                    | NIK Deg.             | Based on estimated 15-minute half-life/Fitted                                                                                                                                                         |
| <b>I<math>\kappa</math>B Reactions</b>                                           |           |               |                                           |                      |                                                                                                                                                                                                       |
| mRNA => mRNA + protein                                                           | Nuc ->Cyt | 11            | 12 proteins/mRNA/min                      | Translation          | Derived from the elongation rate of the ribosome and corrected for the nucleotide spacing between adjacent ribosomes on the same transcript 1800 nt min <sup>-1</sup> / 150 nt = 12 min <sup>-1</sup> |
| =>tkB $\alpha$ (A50/A52-induced)                                                 | Nucleus   | 12            | 200 Fold over constitutive                | I $\kappa$ B Synth.  | Refer to #1                                                                                                                                                                                           |
| Hill K <sub>d</sub> (A50/A52-induced)                                            | Nucleus   | 13            | 150 nM                                    | I $\kappa$ B Synth.  | Refer to #1                                                                                                                                                                                           |
| =>tkB $\epsilon$ (A50/A52-induced, 37 min. delay)                                | Nucleus   | 14            | 25 Fold over constitutive                 | I $\kappa$ B Synth.  | Refer to #1                                                                                                                                                                                           |
| Hill K <sub>d</sub> (A50/A52-induced)                                            | Nucleus   | 15            | 150 nM                                    | I $\kappa$ B Synth.  | Refer to #1                                                                                                                                                                                           |
| =>tkB $\epsilon$ (C50/C52-induced, 37 min. delay)                                | Nucleus   | 16            | 250 Fold over constitutive                | I $\kappa$ B Synth.  | Refer to #1                                                                                                                                                                                           |
| Hill K <sub>d</sub> (C50/C52-induced)                                            | Nucleus   | 17            | 150 nM                                    | I $\kappa$ B Synth.  | Refer to #1                                                                                                                                                                                           |
| p100 + p100 =>I $\kappa$ B $\delta$                                              | Cyt, Nuc  | 18            | 1.2e-2 nM <sup>-1</sup> min <sup>-1</sup> | I $\kappa$ B Synth.  | Estimated a K <sub>d</sub> of 10nM                                                                                                                                                                    |
| I $\kappa$ B $\delta$ => p100 + p100                                             | Cyt, Nuc  | 19            | 1.2e-2 min <sup>-1</sup>                  | I $\kappa$ B Synth.  | Refer to #19                                                                                                                                                                                          |
| I $\kappa$ B $\alpha$ (c) =>I $\kappa$ B $\alpha$ (n)                            | Cyt ->Nuc | 20            | 6.0e-2 min <sup>-1</sup>                  | Transport            | Adapted from (Shih et al., 2009)                                                                                                                                                                      |

|                                                                                                          |           |    |                                              |                      |                                                                                                          |
|----------------------------------------------------------------------------------------------------------|-----------|----|----------------------------------------------|----------------------|----------------------------------------------------------------------------------------------------------|
| I $\kappa$ B $\beta$ (c)<br>=>I $\kappa$ B $\beta$ (n)                                                   | Cyt ->Nuc | 21 | 9.0-3 min <sup>-1</sup>                      | Transport            | (Shih et al., 2009)                                                                                      |
| I $\kappa$ B $\epsilon$ (c)<br>=>I $\kappa$ B $\epsilon$ (n)                                             | Cyt ->Nuc | 22 | 4.5e-2 min <sup>-1</sup>                     | Transport            | (Shih et al., 2009)                                                                                      |
| I $\kappa$ B $\delta$ (c)<br>=>I $\kappa$ B $\delta$ (n)                                                 | Cyt ->Nuc | 23 | 4.5e-2 min <sup>-1</sup>                     | Transport            | (Shih et al., 2009)                                                                                      |
| I $\kappa$ B[ $\alpha/\beta/\epsilon/\delta$ ](n)<br>=>I $\kappa$ B[ $\alpha/\beta/\epsilon/\delta$ ](c) | Nuc ->Cyt | 24 | 1.2e-2 min <sup>-1</sup>                     | Transport            | (Shih et al., 2009)                                                                                      |
| I $\kappa$ B $\alpha$ =>                                                                                 | Nucleus   | 25 | 2.9e-2 min <sup>-1</sup>                     | I $\kappa$ B Deg.    | mRNA half-life measurements using actinomycin-D treatment of cells and RPA (unpublished results)         |
| I $\kappa$ B $\beta$ =>                                                                                  | Nucleus   | 26 | 2.9e-3 min <sup>-1</sup>                     | I $\kappa$ B Deg.    | <i>Refer to #25</i>                                                                                      |
| I $\kappa$ B $\epsilon$ =>                                                                               | Nucleus   | 27 | 3.8e-3 min <sup>-1</sup>                     | I $\kappa$ B Deg.    | <i>Refer to #25</i>                                                                                      |
| I $\kappa$ B $\alpha$ =>                                                                                 | Cyt, Nuc  | 28 | 0.12 min <sup>-1</sup>                       | I $\kappa$ B Deg.    | (Shih et al., 2009)                                                                                      |
| I $\kappa$ B $\beta$ =>                                                                                  | Cyt, Nuc  | 29 | 0.12 min <sup>-1</sup>                       | I $\kappa$ B Deg.    | (Shih et al., 2009)                                                                                      |
| I $\kappa$ B $\epsilon$ =>                                                                               | Cyt, Nuc  | 30 | 1.2e-2 min <sup>-1</sup>                     | I $\kappa$ B Deg.    | Based on estimated 1 hour half-life                                                                      |
| I $\kappa$ B $\delta$ =>                                                                                 | Cyt, Nuc  | 31 | 3e-3 min <sup>-1</sup>                       | I $\kappa$ B Deg.    | Based on estimated 4 hour half-life                                                                      |
| I $\kappa$ B[ $\alpha/\beta/\epsilon/\delta$ ]-NF $\kappa$ B<br>=>NF $\kappa$ B                          | Cyt, Nuc  | 32 | 2.4e-4 min <sup>-1</sup>                     | I $\kappa$ B Deg.    | Based on estimated 48 hour half-life                                                                     |
| I $\kappa$ B $\alpha$ =><br>(NEMO-mediated)                                                              | Cytoplasm | 33 | 1.4e-3 nM <sup>-1</sup><br>min <sup>-1</sup> | I $\kappa$ B Deg.    | Based on measured I $\kappa$ B degradation timecourses given numerical input curves                      |
| I $\kappa$ B $\alpha$ NF $\kappa$ B<br>=>NF $\kappa$ B<br>(NEMO-mediated)                                | Cytoplasm | 33 | 1.4e-3 nM <sup>-1</sup><br>min <sup>-1</sup> | I $\kappa$ B Deg.    |                                                                                                          |
| I $\kappa$ B $\beta$ =><br>(NEMO-mediated)                                                               | Cytoplasm | 34 | 4.5e-4 nM <sup>-1</sup><br>min <sup>-1</sup> | I $\kappa$ B Deg.    | <i>Refer to # 33</i>                                                                                     |
| I $\kappa$ B $\beta$ NF $\kappa$ B<br>=>NF $\kappa$ B<br>(NEMO-mediated)                                 | Cytoplasm | 34 | 4.5e-4 nM <sup>-1</sup><br>min <sup>-1</sup> | I $\kappa$ B Deg.    | <i>Refer to # 33</i>                                                                                     |
| I $\kappa$ B $\epsilon$ =><br>(NEMO-mediated)                                                            | Cytoplasm | 35 | 3.4e-4 nM <sup>-1</sup><br>min <sup>-1</sup> | I $\kappa$ B Deg.    | <i>Refer to # 33</i>                                                                                     |
| I $\kappa$ B $\epsilon$ NF $\kappa$ B<br>=>NF $\kappa$ B<br>(NEMO-mediated)                              | Cytoplasm | 35 | 3.4e-4 nM <sup>-1</sup><br>min <sup>-1</sup> | I $\kappa$ B Deg.    | <i>Refer to # 33</i>                                                                                     |
| I $\kappa$ B $\delta$ =><br>(NIK-mediated)                                                               | Cytoplasm | 36 | 0.6 nM <sup>-1</sup> min <sup>-1</sup>       | I $\kappa$ B Deg.    | $V_{max}$ and $K_m$ of NIK-mediated reactions based on protein degradation and estimated NIK abundances. |
| I $\kappa$ B $\delta$ NF $\kappa$ B<br>=>NF $\kappa$ B<br>(NIK-mediated)                                 | Cytoplasm | 36 | 0.6 nM <sup>-1</sup> min <sup>-1</sup>       | I $\kappa$ B Deg.    |                                                                                                          |
| I $\kappa$ B $\delta$ =><br>(NIK-mediated,<br>$K_m$ )                                                    | Cytoplasm | 37 | 100 nM                                       | I $\kappa$ B Deg.    | <i>Refer to #36</i>                                                                                      |
| <b>NF-<math>\kappa</math>B reactions</b>                                                                 |           |    |                                              |                      |                                                                                                          |
| p100 => p52<br>(NIK-mediated)                                                                            | Cytoplasm | 38 | 5.0e-2 nM <sup>-1</sup><br>min <sup>-1</sup> | NF $\kappa$ B Synth. | <i>Refer to #36</i>                                                                                      |
| p100 => p52<br>(NIK-mediated,<br>p100 $K_m$ )                                                            | Cytoplasm | 39 | 10 nM                                        | NF $\kappa$ B Synth. | <i>Refer to #36</i>                                                                                      |
| =>cRel<br>(A50/A52/C50/C52-induced, 1 hr delay)                                                          | Nucleus   | 40 | 200 Fold over constitutive                   | NF $\kappa$ B Synth. | <i>Refer to #1/Fitted</i>                                                                                |

|                                          |          |    |                                           |                      |                                                                  |
|------------------------------------------|----------|----|-------------------------------------------|----------------------|------------------------------------------------------------------|
| Hill $K_d$<br>(A50/A52/C50/C52-induced)  | Nucleus  | 41 | 150 nM                                    | NF $\kappa$ B Synth. | <i>Refer to #1/Fitted</i>                                        |
| =>tp100<br>(A50/A52-induced, 4 hr delay) | Nucleus  | 42 | 1000 Fold over constitutive               | NF $\kappa$ B Synth. | <i>Refer to #1/Fitted</i>                                        |
| Hill $K_d$ (A50/A52-induced)             | Nucleus  | 43 | 50 nM                                     | NF $\kappa$ B Synth. | <i>Refer to #1/Fitted</i>                                        |
| =>tp100<br>(C50/C52-induced, 4 hr delay) | Nucleus  | 44 | 1500 Fold over constitutive               | NF $\kappa$ B Synth. | <i>Refer to #1/Fitted</i>                                        |
| Hill $K_d$ (C50/C52-induced)             | Nucleus  | 45 | 50 nM                                     | NF $\kappa$ B Synth. | <i>Refer to #1/Fitted</i>                                        |
| tRelA =>                                 | Nucleus  | 46 | $2.9e-3 \text{ min}^{-1}$                 | NF $\kappa$ B Deg.   | <i>Refer to #25</i>                                              |
| tp50 =>                                  | Nucleus  | 47 | $2.9e-3 \text{ min}^{-1}$                 | NF $\kappa$ B Deg.   | <i>Refer to #25</i>                                              |
| tRelB =>                                 | Nucleus  | 48 | $2.9e-3 \text{ min}^{-1}$                 | NF $\kappa$ B Deg.   | <i>Refer to #25</i>                                              |
| tp100 =>                                 | Nucleus  | 49 | $9.6e-4 \text{ min}^{-1}$                 | NF $\kappa$ B Deg.   | <i>Refer to #25</i>                                              |
| tcRel=>                                  | Nucleus  | 50 | $9.6e-4 \text{ min}^{-1}$                 | NF $\kappa$ B Deg.   | <i>Refer to #25</i>                                              |
| RelA =>                                  | Cyt, Nuc | 51 | $2.3e-2 \text{ min}^{-1}$                 | NF $\kappa$ B Deg.   | Based on estimated 0.5 hour half-life of NF- $\kappa$ B monomers |
| p50 =>                                   | Cyt, Nuc | 51 | $2.3e-2 \text{ min}^{-1}$                 | NF $\kappa$ B Deg.   |                                                                  |
| RelB =>                                  | Cyt, Nuc | 51 | $2.3e-2 \text{ min}^{-1}$                 | NF $\kappa$ B Deg.   |                                                                  |
| p100 =>                                  | Cyt, Nuc | 51 | $2.3e-2 \text{ min}^{-1}$                 | NF $\kappa$ B Deg.   |                                                                  |
| cRel =>                                  | Cyt, Nuc | 51 | $2.3e-2 \text{ min}^{-1}$                 | NF $\kappa$ B Deg.   |                                                                  |
| p52 =>                                   | Cyt, Nuc | 51 | $2.3e-2 \text{ min}^{-1}$                 | NF $\kappa$ B Deg.   |                                                                  |
| RelA + p50 =><br>RelAp50                 | Cyt, Nuc | 52 | $1.9e-3 \text{ nM}^{-1} \text{ min}^{-1}$ | NF $\kappa$ B Synth. | Based on dimerization studies (unpublished results)              |
| RelA + p52 =><br>RelAp52                 | Cyt, Nuc | 52 | $1.9e-3 \text{ nM}^{-1} \text{ min}^{-1}$ | NF $\kappa$ B Synth. |                                                                  |
| RelB + p52 =><br>RelBp52                 | Cyt, Nuc | 53 | $9.6e-4 \text{ nM}^{-1} \text{ min}^{-1}$ | NF $\kappa$ B Synth. |                                                                  |
| RelB + p50 =><br>RelBp50                 | Cyt, Nuc | 53 | $3e-4 \text{ nM}^{-1} \text{ min}^{-1}$   | NF $\kappa$ B Synth. |                                                                  |
| cRel + p50 =><br>cRelp50                 | Cyt, Nuc | 54 | $9.6e-4 \text{ nM}^{-1} \text{ min}^{-1}$ | NF $\kappa$ B Synth. |                                                                  |
| cRel + p52 =><br>cRelp52                 | Cyt, Nuc | 55 | $1.9e-3 \text{ nM}^{-1} \text{ min}^{-1}$ | NF $\kappa$ B Synth. |                                                                  |
| p50 + p50 =><br>p50p50                   | Cyt, Nuc | 56 | $1.8e-3 \text{ nM}^{-1} \text{ min}^{-1}$ | NF $\kappa$ B Synth. |                                                                  |
| p52+ p52 =><br>p52p52                    | Cyt, Nuc | 57 | $1.8e-3 \text{ nM}^{-1} \text{ min}^{-1}$ | NF $\kappa$ B Synth. |                                                                  |
| RelAp50 => RelA + p50                    | Cyt      | 58 | $1.9e-2 \text{ min}^{-1}$                 | NF $\kappa$ B Synth. | Based on dimerization studies (unpublished results)              |
| RelAp52 => RelA + p52                    | Cyt      | 59 | $3.8e-2 \text{ min}^{-1}$                 | NF $\kappa$ B Synth. |                                                                  |
| RelBp52 => RelB + p52                    | Cyt      | 60 | $1.4e-2 \text{ min}^{-1}$                 | NF $\kappa$ B Synth. |                                                                  |
| RelBp50 => RelB + p50                    | Cyt      | 61 | $4.6e-3 \text{ min}^{-1}$                 | NF $\kappa$ B Synth. |                                                                  |
| cRelp50 =>cRel + p50                     | Cyt      | 62 | $1.4e-3 \text{ min}^{-1}$                 | NF $\kappa$ B Synth. |                                                                  |
| cRelp52 =>cRel + p52                     | Cyt      | 63 | $1.4e-3 \text{ min}^{-1}$                 | NF $\kappa$ B Synth. |                                                                  |
| RelAp50 => RelA + p50                    | Nuc      | 64 | $1.9e-3 \text{ min}^{-1}$                 | NF $\kappa$ B Synth. | Estimated 10 fold higher affinity due to DNA binding             |
| RelAp52 => RelA + p52                    | Nuc      | 65 | $3.8e-3 \text{ min}^{-1}$                 | NF $\kappa$ B Synth. | <i>Refer to #64</i>                                              |

|                                                                                                               |           |    |                                           |                                        |                                                     |
|---------------------------------------------------------------------------------------------------------------|-----------|----|-------------------------------------------|----------------------------------------|-----------------------------------------------------|
| RelBp52 => RelB + p52                                                                                         | Nuc       | 66 | 1.4e-3 min <sup>-1</sup>                  | NF $\kappa$ B Synth.                   | Refer to #64                                        |
| RelBp50 => RelB + p50                                                                                         | Nuc       | 67 | 4.6e-3 min <sup>-1</sup>                  | NF $\kappa$ B Synth.                   | Refer to #64                                        |
| cRelp50 =>cRel + p50                                                                                          | Nuc       | 68 | 1.4e-4 min <sup>-1</sup>                  | NF $\kappa$ B Synth.                   | Refer to #64                                        |
| cRelp52 =>cRel + p52                                                                                          | Nuc       | 69 | 1.4e-4min <sup>-1</sup>                   | NF $\kappa$ B Synth.                   | Refer to #64                                        |
| p50p50 => p50 + p50                                                                                           | Cyt, Nuc  | 70 | 5.4e-2min <sup>-1</sup>                   | NF $\kappa$ B Synth.                   | Based on dimerization studies (unpublished results) |
| p52p52 => p52+ p52                                                                                            | Cyt, Nuc  | 71 | 5.4e-2min <sup>-1</sup>                   | NF $\kappa$ B Synth.                   | Based on dimerization studies (unpublished results) |
| RelAp50(c) =>RelAp50(n)                                                                                       | Cyt ->Nuc | 72 | 5.4 min <sup>-1</sup>                     | Transport                              | (Shih et al., 2009)                                 |
| RelAp52(c) =>RelAp52(n)                                                                                       | Cyt ->Nuc | 72 | 5.4 min <sup>-1</sup>                     | Transport                              | (Shih et al., 2009)                                 |
| RelBp52(c) =>RelBp52(n)                                                                                       | Cyt ->Nuc | 72 | 5.4 min <sup>-1</sup>                     | Transport                              | (Shih et al., 2009)                                 |
| RelBp50(c) =>RelBp50(n)                                                                                       | Cyt ->Nuc | 72 | 5.4 min <sup>-1</sup>                     | Transport                              | (Shih et al., 2009)                                 |
| cRelp50(c) => cRelp50(n)                                                                                      | Cyt ->Nuc | 72 | 5.4 min <sup>-1</sup>                     | Transport                              | (Shih et al., 2009)                                 |
| cRelp52(c) => cRelp52(n)                                                                                      | Cyt ->Nuc | 72 | 5.4 min <sup>-1</sup>                     | Transport                              | (Shih et al., 2009)                                 |
| p50p50(c) => p50p50(n)                                                                                        | Cyt ->Nuc | 72 | 5.4 min <sup>-1</sup>                     | Transport                              | (Shih et al., 2009)                                 |
| p52p52(c) => p52p52(n)                                                                                        | Cyt ->Nuc | 72 | 5.4 min <sup>-1</sup>                     | Transport                              | (Shih et al., 2009)                                 |
| NF $\kappa$ B(n) =>NF $\kappa$ B(c)                                                                           | Nuc ->Cyt | 73 | 4.8e-3 min <sup>-1</sup>                  | Transport                              | (Shih et al., 2009)                                 |
| RelAp50 =>                                                                                                    | Cyt, Nuc  | 74 | 2.4e-4 min <sup>-1</sup>                  | NF $\kappa$ B Deg.                     | Based on estimated 48 hour half-life                |
| RelAp52 =>                                                                                                    | Cyt, Nuc  | 74 | 2.4e-4 min <sup>-1</sup>                  | NF $\kappa$ B Deg.                     |                                                     |
| RelBp50 =>                                                                                                    | Cyt, Nuc  | 74 | 2.4e-4 min <sup>-1</sup>                  | NF $\kappa$ B Deg.                     |                                                     |
| RelBp52 =>                                                                                                    | Cyt, Nuc  | 74 | 2.4e-4 min <sup>-1</sup>                  | NF $\kappa$ B Deg.                     |                                                     |
| cRelp50 =>                                                                                                    | Cyt, Nuc  | 74 | 2.4e-4 min <sup>-1</sup>                  | NF $\kappa$ B Deg.                     |                                                     |
| cRelp52 =>                                                                                                    | Cyt, Nuc  | 74 | 2.4e-4 min <sup>-1</sup>                  | NF $\kappa$ B Deg.                     |                                                     |
| p50p50 =>                                                                                                     | Cyt, Nuc  | 74 | 2.4e-4 min <sup>-1</sup>                  | NF $\kappa$ B Deg.                     |                                                     |
| p52p52 =>                                                                                                     | Cyt, Nuc  | 74 | 2.4e-4 min <sup>-1</sup>                  | NF $\kappa$ B Deg.                     |                                                     |
| I $\kappa$ B[ $\alpha/\beta/\epsilon/\delta$ ]-NF $\kappa$ B =>I $\kappa$ B[ $\alpha/\beta/\epsilon/\delta$ ] | Cyt, Nuc  | 75 | 2.4e-4 min <sup>-1</sup>                  | NF $\kappa$ B Deg.                     | Refer to #74                                        |
| <b>I<math>\kappa</math>B:NF-<math>\kappa</math>B interactions</b>                                             |           |    |                                           |                                        |                                                     |
| I $\kappa$ B $\alpha$ + RelA:p50 =>I $\kappa$ B $\alpha$ :RelA:p50                                            | Cyt, Nuc  | 76 | 3e-3 nM <sup>-1</sup> min <sup>-1</sup>   | I $\kappa$ B-NF $\kappa$ B interaction | Adapted from Alves et. al 2013                      |
| I $\kappa$ B $\beta$ + RelA:p50 =>I $\kappa$ B $\beta$ :RelA:p50                                              | Cyt, Nuc  | 77 | 2e-4 nM <sup>-1</sup> min <sup>-1</sup>   | I $\kappa$ B-NF $\kappa$ B interaction | Adapted from Alves et. al 2013                      |
| I $\kappa$ B $\epsilon$ + RelA:p50 => I $\kappa$ B $\epsilon$ :RelA:p50                                       | Cyt, Nuc  | 78 | 1.3e-3 nM <sup>-1</sup> min <sup>-1</sup> | I $\kappa$ B-NF $\kappa$ B interaction | Adapted from Alves et. al 2013                      |
| I $\kappa$ B $\delta$ + RelA:p50 => I $\kappa$ B $\delta$ :RelA:p50                                           | Cyt, Nuc  | 79 | 6e-4 nM <sup>-1</sup> min <sup>-1</sup>   | I $\kappa$ B-NF $\kappa$ B interaction | Adapted from Alves et. al 2013                      |
| I $\kappa$ B $\alpha$ + RelA:p52 =>I $\kappa$ B $\alpha$ :RelA:p52                                            | Cyt, Nuc  | 76 | 3e-3 nM <sup>-1</sup> min <sup>-1</sup>   | I $\kappa$ B-NF $\kappa$ B interaction | Adapted from Alves et. al 2013                      |
| I $\kappa$ B $\beta$ + RelA:p52 =>I $\kappa$ B $\beta$ :RelA:p52                                              | Cyt, Nuc  | 77 | 2e-4 nM <sup>-1</sup> min <sup>-1</sup>   | I $\kappa$ B-NF $\kappa$ B interaction | Adapted from Alves et. al 2013                      |
| I $\kappa$ B $\epsilon$ + RelA:p52 => I $\kappa$ B $\epsilon$ :RelA:p52                                       | Cyt, Nuc  | 78 | 1.3e-3 nM <sup>-1</sup> min <sup>-1</sup> | I $\kappa$ B-NF $\kappa$ B interaction | Adapted from Alves et. al 2013                      |
| I $\kappa$ B $\delta$ + RelA:p52 => I $\kappa$ B $\delta$ :RelA:p52                                           | Cyt, Nuc  | 79 | 6e-4 nM <sup>-1</sup> min <sup>-1</sup>   | I $\kappa$ B-NF $\kappa$ B interaction | Adapted from Alves et. al 2013                      |

|                                                                               |          |    |                                               |                                           |                                       |
|-------------------------------------------------------------------------------|----------|----|-----------------------------------------------|-------------------------------------------|---------------------------------------|
| I $\kappa$ B $\alpha$ + RelB:p50<br>=> I $\kappa$ B $\alpha$ :RelB:p50        | Cyt, Nuc | 80 | 1.3e-3 nM <sup>-1</sup><br>min <sup>-1</sup>  | I $\kappa$ B-NF $\kappa$ B<br>interaction | Adapted from <i>Alves et. al 2013</i> |
| I $\kappa$ B $\epsilon$ + RelB:p50<br>=> I $\kappa$ B $\epsilon$ :RelB:p50    | Cyt, Nuc | 81 | 1.3e-3 nM <sup>-1</sup><br>min <sup>-1</sup>  | I $\kappa$ B-NF $\kappa$ B<br>interaction | Adapted from <i>Alves et. al 2013</i> |
| I $\kappa$ B $\delta$ + RelB:p50<br>=> I $\kappa$ B $\delta$ :RelB:p50        | Cyt, Nuc | 82 | 6e-4 nM <sup>-1</sup> min <sup>-1</sup>       | I $\kappa$ B-NF $\kappa$ B<br>interaction | Adapted from <i>Alves et. al 2013</i> |
| I $\kappa$ B $\alpha$ + cRel:p50<br>=> I $\kappa$ B $\alpha$ :cRel:p50        | Cyt, Nuc | 83 | 3e-3 nM <sup>-1</sup> min <sup>-1</sup>       | I $\kappa$ B-NF $\kappa$ B<br>interaction | Adapted from <i>Alves et. al 2013</i> |
| I $\kappa$ B $\beta$ + cRel:p50<br>=> I $\kappa$ B $\beta$ :cRel:p50          | Cyt, Nuc | 84 | 2.1e-4 nM <sup>-1</sup><br>min <sup>-1</sup>  | I $\kappa$ B-NF $\kappa$ B<br>interaction | Adapted from <i>Alves et. al 2013</i> |
| I $\kappa$ B $\epsilon$ + cRel:p50<br>=> I $\kappa$ B $\epsilon$ :cRel:p50    | Cyt, Nuc | 85 | 1.3e-3 nM <sup>-1</sup><br>min <sup>-1</sup>  | I $\kappa$ B-NF $\kappa$ B<br>interaction | Adapted from <i>Alves et. al 2013</i> |
| I $\kappa$ B $\delta$ + cRel:p50<br>=> I $\kappa$ B $\delta$ :cRel:p50        | Cyt, Nuc | 86 | 1.98e-2 nM <sup>-1</sup><br>min <sup>-1</sup> | I $\kappa$ B-NF $\kappa$ B<br>interaction | Adapted from <i>Alves et. al 2013</i> |
| I $\kappa$ B $\alpha$ + cRel:p52<br>=> I $\kappa$ B $\alpha$ :RelA:p52        | Cyt, Nuc | 83 | 3e-3 nM <sup>-1</sup> min <sup>-1</sup>       | I $\kappa$ B-NF $\kappa$ B<br>interaction | Adapted from <i>Alves et. al 2013</i> |
| I $\kappa$ B $\beta$ + cRel:p52<br>=> I $\kappa$ B $\beta$ :cRel:p52          | Cyt, Nuc | 84 | 2.1e-4 nM <sup>-1</sup><br>min <sup>-1</sup>  | I $\kappa$ B-NF $\kappa$ B<br>interaction | Adapted from <i>Alves et. al 2013</i> |
| I $\kappa$ B $\epsilon$ + cRel:p52<br>=> I $\kappa$ B $\epsilon$ :cRel:p52    | Cyt, Nuc | 85 | 1.3e-3 nM <sup>-1</sup><br>min <sup>-1</sup>  | I $\kappa$ B-NF $\kappa$ B<br>interaction | Adapted from <i>Alves et. al 2013</i> |
| I $\kappa$ B $\delta$ + cRel:p52<br>=> I $\kappa$ B $\delta$ :cRel:p52        | Cyt, Nuc | 86 | 1.98e-2 nM <sup>-1</sup><br>min <sup>-1</sup> | I $\kappa$ B-NF $\kappa$ B<br>interaction | Adapted from <i>Alves et. al 2013</i> |
| I $\kappa$ B $\alpha$ :RelA:p50<br>=> I $\kappa$ B $\alpha$ +<br>RelA:p50     | Cyt, Nuc | 87 | 6e-4 min <sup>-1</sup>                        | I $\kappa$ B-NF $\kappa$ B<br>interaction | Fitted (dependent on 76-79)           |
| I $\kappa$ B $\beta$ :RelA:p50<br>=> I $\kappa$ B $\beta$ +<br>RelA:p50       | Cyt, Nuc | 88 | 1.7e-2 min <sup>-1</sup>                      | I $\kappa$ B-NF $\kappa$ B<br>interaction |                                       |
| I $\kappa$ B $\epsilon$ :RelA:p50<br>=> I $\kappa$ B $\epsilon$ +<br>RelA:p50 | Cyt, Nuc | 89 | 6e-3 min <sup>-1</sup>                        | I $\kappa$ B-NF $\kappa$ B<br>interaction |                                       |
| I $\kappa$ B $\delta$ :RelA:p50<br>=> I $\kappa$ B $\delta$ +<br>RelA:p50     | Cyt, Nuc | 90 | 8.4e-4 min <sup>-1</sup>                      | I $\kappa$ B-NF $\kappa$ B<br>interaction |                                       |
| I $\kappa$ B $\alpha$ :RelA:p52<br>=> I $\kappa$ B $\alpha$ +<br>RelA:p52     | Cyt, Nuc | 91 | 6e-4 min <sup>-1</sup>                        | I $\kappa$ B-NF $\kappa$ B<br>interaction | Fitted (dependent on 76-79)           |
| I $\kappa$ B $\beta$ :RelA:p52<br>=> I $\kappa$ B $\beta$ +<br>RelA:p52       | Cyt, Nuc | 92 | 1.7e-2 min <sup>-1</sup>                      | I $\kappa$ B-NF $\kappa$ B<br>interaction |                                       |
| I $\kappa$ B $\epsilon$ :RelA:p52<br>=> I $\kappa$ B $\epsilon$ +<br>RelA:p52 | Cyt, Nuc | 93 | 6e-3 min <sup>-1</sup>                        | I $\kappa$ B-NF $\kappa$ B<br>interaction |                                       |
| I $\kappa$ B $\delta$ :RelA:p52<br>=> I $\kappa$ B $\delta$ +<br>RelA:p52     | Cyt, Nuc | 94 | 8.4e-4 min <sup>-1</sup>                      | I $\kappa$ B-NF $\kappa$ B<br>interaction |                                       |
| I $\kappa$ B $\alpha$ :RelB:p50<br>=> I $\kappa$ B $\alpha$ +<br>RelB:p50     | Cyt, Nuc | 95 | 3e-2 min <sup>-1</sup>                        | I $\kappa$ B-NF $\kappa$ B<br>interaction | Fitted (dependent on 80 -82)          |
| I $\kappa$ B $\epsilon$ :RelB:p50<br>=> I $\kappa$ B $\epsilon$ +<br>RelB:p50 | Cyt, Nuc | 96 | 3e-2 min <sup>-1</sup>                        | I $\kappa$ B-NF $\kappa$ B<br>interaction |                                       |
| I $\kappa$ B $\delta$ :RelB:p50<br>=> I $\kappa$ B $\delta$ +<br>RelB:p50     | Cyt, Nuc | 97 | 8.4e-4 min <sup>-1</sup>                      | I $\kappa$ B-NF $\kappa$ B<br>interaction |                                       |
| I $\kappa$ B $\alpha$ :cRel:p50<br>=> I $\kappa$ B $\alpha$ +<br>cRel:p50     | Cyt, Nuc | 98 | 4.8e-3 min <sup>-1</sup>                      | I $\kappa$ B-NF $\kappa$ B<br>interaction | Fitted (dependent on 83-86)           |

|                                                                                          |           |     |                          |                                           |                                                                       |
|------------------------------------------------------------------------------------------|-----------|-----|--------------------------|-------------------------------------------|-----------------------------------------------------------------------|
| I $\kappa$ B $\beta$ :cRel:p50<br>=>I $\kappa$ B $\beta$<br>+cRel:p50                    | Cyt, Nuc  | 99  | 1.7e-2 min <sup>-1</sup> | I $\kappa$ B-NF $\kappa$ B<br>interaction |                                                                       |
| I $\kappa$ B $\epsilon$ :cRel:p50<br>=>I $\kappa$ B $\epsilon$ +<br>cRel:p50             | Cyt, Nuc  | 100 | 2.7e-5 min <sup>-1</sup> | I $\kappa$ B-NF $\kappa$ B<br>interaction |                                                                       |
| I $\kappa$ B $\delta$ :cRel:p50<br>=>I $\kappa$ B $\delta$ +<br>cRel:p50                 | Cyt, Nuc  | 101 | 8.4e-4 min <sup>-1</sup> | I $\kappa$ B-NF $\kappa$ B<br>interaction |                                                                       |
| I $\kappa$ B $\alpha$ :cRel:p52<br>=>I $\kappa$ B $\alpha$ +<br>cRel:p52                 | Cyt, Nuc  | 98  | 4.8e-3 min <sup>-1</sup> | I $\kappa$ B-NF $\kappa$ B<br>interaction | Fitted (dependent on 83-86)                                           |
| I $\kappa$ B $\beta$ :cRel:p52<br>=>I $\kappa$ B $\beta$ +<br>cRel:p52                   | Cyt, Nuc  | 99  | 1.7e-2 min <sup>-1</sup> | I $\kappa$ B-NF $\kappa$ B<br>interaction |                                                                       |
| I $\kappa$ B $\epsilon$ :cRel:p52<br>=>I $\kappa$ B $\epsilon$ +<br>cRel:p52             | Cyt, Nuc  | 100 | 2.7e-5 min <sup>-1</sup> | I $\kappa$ B-NF $\kappa$ B<br>interaction |                                                                       |
| I $\kappa$ B $\delta$ :cRel:p52<br>=>I $\kappa$ B $\delta$ +<br>cRel:p52                 | Cyt, Nuc  | 101 | 8.4e-4 min <sup>-1</sup> | I $\kappa$ B-NF $\kappa$ B<br>interaction |                                                                       |
| I $\kappa$ B $\alpha$ :NF $\kappa$ B(c)<br>=>I $\kappa$ B $\alpha$ :NF $\kappa$ B(n)     | Cyt ->Nuc | 102 | 0.28 min <sup>-1</sup>   | Transport                                 | (Shih et al., 2009)                                                   |
| I $\kappa$ B $\beta$ :NF $\kappa$ B(c)<br>=>I $\kappa$ B $\beta$ :NF $\kappa$ B(n)       | Cyt ->Nuc | 103 | 0.028 min <sup>-1</sup>  | Transport                                 | (Shih et al., 2009)                                                   |
| I $\kappa$ B $\delta$ :NF $\kappa$ B(c)<br>=>I $\kappa$ B $\delta$ :NF $\kappa$ B(n)     | Cyt ->Nuc | 104 | 0.028 min <sup>-1</sup>  | Transport                                 | Based on slower import rate of<br>I $\kappa$ B $\beta$ :NF $\kappa$ B |
| I $\kappa$ B $\epsilon$ :NF $\kappa$ B(c)<br>=>I $\kappa$ B $\epsilon$ :NF $\kappa$ B(n) | Cyt ->Nuc | 105 | 0.14 min <sup>-1</sup>   | Transport                                 | (Shih et al., 2009)                                                   |
| I $\kappa$ B $\alpha$ :NF $\kappa$ B(n)<br>=>I $\kappa$ B $\alpha$ :NF $\kappa$ B(c)     | Nuc ->Cyt | 106 | 0.84 min <sup>-1</sup>   | Transport                                 | (Shih et al., 2009)                                                   |
| I $\kappa$ B $\beta$ :NF $\kappa$ B(n)<br>=>I $\kappa$ B $\beta$ :NF $\kappa$ B(c)       | Nuc ->Cyt | 107 | 0.42 min <sup>-1</sup>   | Transport                                 | (Shih et al., 2009)                                                   |
| I $\kappa$ B $\epsilon$ :NF $\kappa$ B(n)<br>=>I $\kappa$ B $\epsilon$ :NF $\kappa$ B(c) | Nuc ->Cyt | 108 | 0.42 min <sup>-1</sup>   | Transport                                 | (Shih et al., 2009)                                                   |
| I $\kappa$ B $\delta$ :NF $\kappa$ B(n)<br>=>I $\kappa$ B $\delta$ :NF $\kappa$ B(c)     | Nuc ->Cyt | 109 | 0.42 min <sup>-1</sup>   | Transport                                 | (Shih et al., 2009)                                                   |

**Table S2. (relates to Figure 4)****Species Table**

Species described in mathematical model (supplementary figure 4).

|       | <b>Species</b>                   | <b>Location</b>    |
|-------|----------------------------------|--------------------|
| 1     | tI $\kappa$ B $\alpha$           | Nucleus            |
| 2     | tI $\kappa$ B $\beta$            | Nucleus            |
| 3     | tI $\kappa$ B $\epsilon$         | Nucleus            |
| 4     | tRelA                            | Nucleus            |
| 5     | tp50                             | Nucleus            |
| 6     | tp100                            | Nucleus            |
| 7     | tcRel                            | Nucleus            |
| 8,9   | I $\kappa$ B $\alpha$            | Nucleus, Cytoplasm |
| 10,11 | I $\kappa$ B $\beta$             | Nucleus, Cytoplasm |
| 12,13 | I $\kappa$ B $\epsilon$          | Nucleus, Cytoplasm |
| 14,15 | I $\kappa$ B $\delta$            | Nucleus, Cytoplasm |
| 16,17 | RelA                             | Nucleus, Cytoplasm |
| 18,19 | RelB                             | Nucleus, Cytoplasm |
| 20,21 | cRel                             | Nucleus, Cytoplasm |
| 22,23 | p50                              | Nucleus, Cytoplasm |
| 24,25 | p100                             | Nucleus, Cytoplasm |
| 26,27 | p52                              | Nucleus, Cytoplasm |
| 28,29 | RelAp50                          | Nucleus, Cytoplasm |
| 30,31 | RelAp52                          | Nucleus, Cytoplasm |
| 32,33 | RelBp50                          | Nucleus, Cytoplasm |
| 34,35 | RelBp52                          | Nucleus, Cytoplasm |
| 36,37 | cRelp50                          | Nucleus, Cytoplasm |
| 38,39 | cRelp52                          | Nucleus, Cytoplasm |
| 40,41 | p50p50                           | Nucleus, Cytoplasm |
| 42,43 | p52p52                           | Nucleus, Cytoplasm |
| 44,45 | I $\kappa$ B $\alpha$ :RelAp50   | Nucleus, Cytoplasm |
| 46,47 | I $\kappa$ B $\beta$ :RelAp50    | Nucleus, Cytoplasm |
| 48,49 | I $\kappa$ B $\epsilon$ :RelAp50 | Nucleus, Cytoplasm |
| 50,51 | I $\kappa$ B $\delta$ :RelAp50   | Nucleus, Cytoplasm |
| 52,53 | I $\kappa$ B $\alpha$ :RelAp52   | Nucleus, Cytoplasm |
| 54,55 | I $\kappa$ B $\beta$ :RelAp52    | Nucleus, Cytoplasm |
| 56,57 | I $\kappa$ B $\epsilon$ :RelAp52 | Nucleus, Cytoplasm |
| 58,59 | I $\kappa$ B $\delta$ :RelAp52   | Nucleus, Cytoplasm |
| 60,61 | I $\kappa$ B $\alpha$ :RelBp50   | Nucleus, Cytoplasm |
| 62,63 | I $\kappa$ B $\epsilon$ :RelBp50 | Nucleus, Cytoplasm |
| 64,65 | I $\kappa$ B $\delta$ :RelBp50   | Nucleus, Cytoplasm |
| 66,67 | I $\kappa$ B $\alpha$ :cRelp50   | Nucleus, Cytoplasm |
| 68,69 | I $\kappa$ B $\beta$ :cRelp50    | Nucleus, Cytoplasm |
| 70,71 | I $\kappa$ B $\epsilon$ :cRelp50 | Nucleus, Cytoplasm |
| 72,73 | I $\kappa$ B $\delta$ :cRelp50   | Nucleus, Cytoplasm |
| 74,75 | I $\kappa$ B $\alpha$ :cRelp52   | Nucleus, Cytoplasm |
| 76,77 | I $\kappa$ B $\beta$ :cRelp52    | Nucleus, Cytoplasm |
| 78,79 | I $\kappa$ B $\epsilon$ :cRelp52 | Nucleus, Cytoplasm |
| 80,81 | I $\kappa$ B $\delta$ :cRelp52   | Nucleus, Cytoplasm |
| 82    | NEMO                             | Cytoplasm          |
| 83    | NIK                              | Cytoplasm          |



**Table S3. (relates to Figure S5 and Figure 4)****Abundances of NF $\kappa$ B / I $\kappa$ B proteins in B cells and MEFs**

Table indicating the NF $\kappa$ B monomer and I $\kappa$ B protein abundances in B cells and MEFs; second column displays the molecule numbers determined by quantitative immunoblot analyses with recombinant protein standards (Figure S5); third column indicates the cellular concentration based on a 2 $\mu$ l volume; fourth column indicates the concentration in B-cells based on the comparative immunoblotting shown in Figure S5F.

| <b>Species</b>          | <b>Molecule numbers per Cell in MEFs</b> | <b>Concentration in MEFs (nM)</b> | <b>Concentration in B-cells (nM)</b> |
|-------------------------|------------------------------------------|-----------------------------------|--------------------------------------|
| RelA                    | ~480,000                                 | ~340                              | ~220                                 |
| p50                     | ~450,000                                 | ~374                              | ~380                                 |
| I $\kappa$ B $\alpha$   | ~400,000                                 | ~220                              | ~150                                 |
| I $\kappa$ B $\beta$    | ~100,000                                 | ~70                               | ~80                                  |
| I $\kappa$ B $\epsilon$ | ~25,000                                  | ~21                               | ~45                                  |
